# Supplementary material
Source: publisher figshare collection journal article supplement (https://adisjournals.figshare.com/articles/dataset/_/24420694)
Supplement: Supplementary file 1 [file 3]

# Disease and economic burden of poor metabolic and weight control in Type 2 Diabetes in Spain: a systematic literature review

Antonio Pérez, Jennifer Redondo-Antón, Irene Romera, Luís Lizán, Miriam Rubio-de Santos, Silvia Díaz-Cerezo, Domingo Orozco-Beltrán.

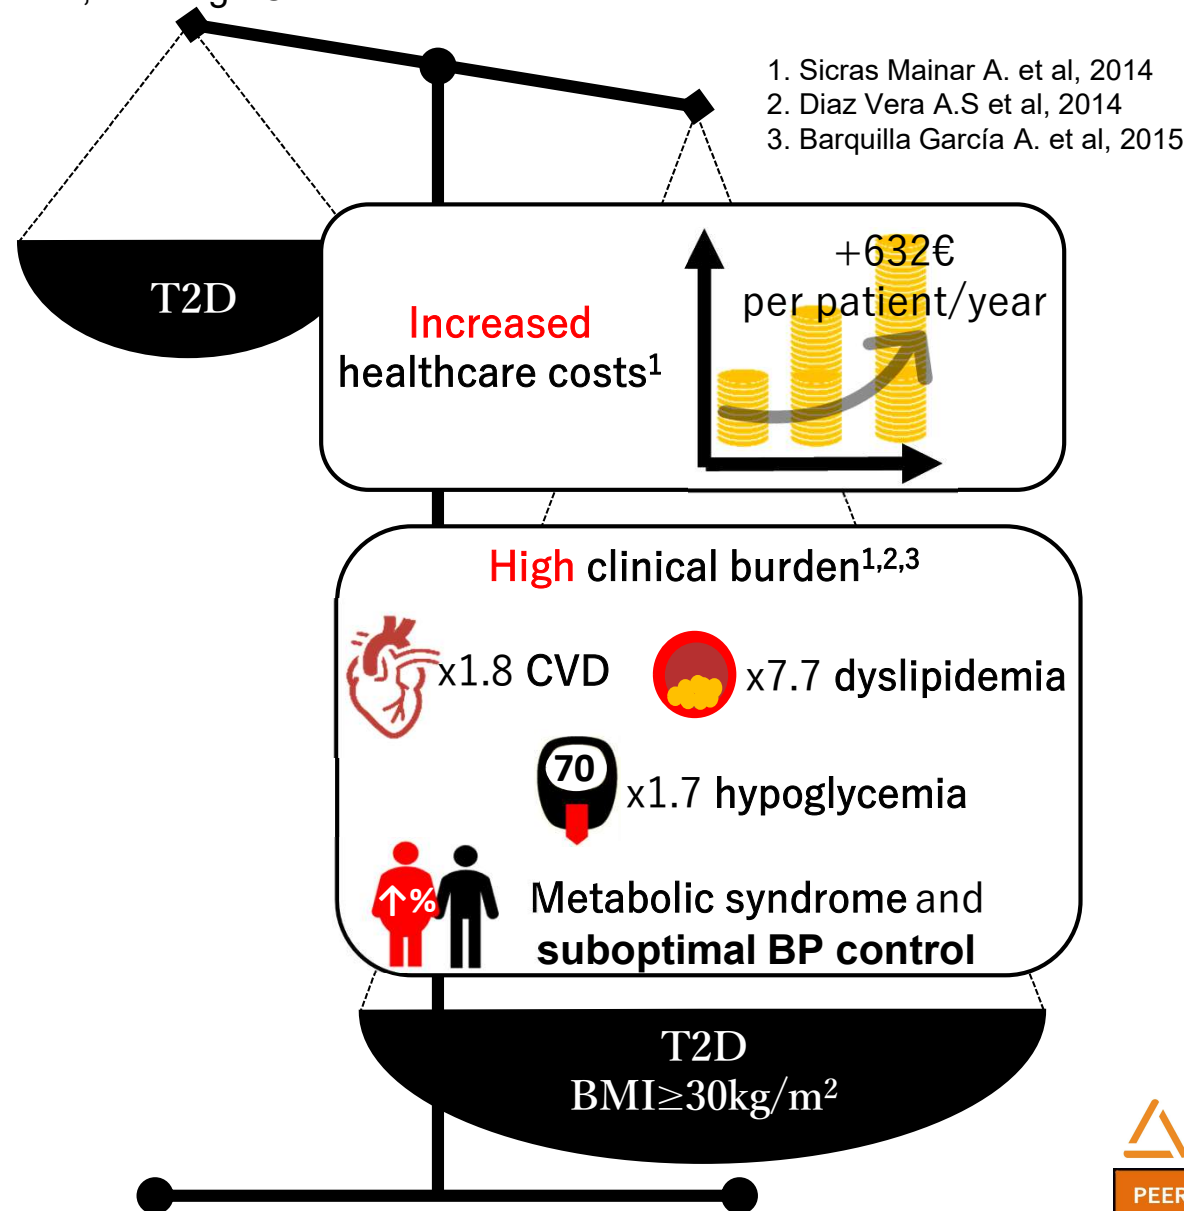

The infographics do not represent the opinion of authors but a summary of main results by topic addressed in the systematic literature review. For a full list of declarations, including funding and author disclosure statements, and copyright information, please see the full text online.
